# Supplementary material for: Rapid whole-heart CMR with single volume super-resolution
Source: Springer Nature journal article supplement (doi:10.1186/s12968-020-00651-x), 2020-01-01
Supplement: MOESM3 [file 18247982]

### Additional File 3

We investigated two network structures; a U-Net and a residual U-Net, with both a  $\ell^1$ -loss function and an  $\ell^2$ -loss function. For each of the four networks, the synthetic training data consisted of 500 paired artefact-free 'ground truth' magnitude images and the corresponding low-resolution images, as described in the main paper.

The resulting networks were tested using 25 previously unseen synthetic low-resolution WH-bSSFP data, as described in the main paper. The table below shows the MSE and SSIM results from the different networks, when compared to the reference high-resolution WH-bSSFP data (mean  $\pm$  standard deviation over the 25 synthetic test data sets).

|                                  | SSIM             | MSE ( $\times 10^{-3}$ ) |
|----------------------------------|------------------|--------------------------|
| Low-resolution data              | 0.87 $\pm$ 0.02  | 1.28 $\pm$ 0.57          |
| Super-resolution data            |                  |                          |
| • U-Net, $\ell^1$ -loss          | 0.94 $\pm$ 0.01* | 0.71 $\pm$ 0.45*         |
| • U-Net, $\ell^2$ -loss          | 0.93 $\pm$ 0.01* | 0.76 $\pm$ 0.46*         |
| • Residual U-Net, $\ell^1$ -loss | 0.96 $\pm$ 0.01  | 0.68 $\pm$ 0.45          |
| • Residual U-Net, $\ell^2$ -loss | 0.94 $\pm$ 0.01* | 0.68 $\pm$ 0.44          |

\*Indicates statistically significantly poorer result compared to the Residual U-Net with  $\ell^1$ -loss ( $p < 0.05$ )

The Residual U-Net with  $\ell^1$ -loss function had significantly higher SSIM (better reconstruction accuracy) than the other networks ( $p < 0.05$ ), with significantly lower MSE (better reconstruction accuracy) than the U-Net with  $\ell^1$ -loss or  $\ell^2$ -loss ( $p < 0.05$ ). Because of this, the Residual U-Net with an  $\ell^1$ -loss function was chosen in this paper.
