# Supplementary material for: Rapid whole-heart CMR with single volume super-resolution
Source: Springer Nature journal article supplement (doi:10.1186/s12968-020-00651-x), 2020-01-01
Supplement: MOESM4 [file 18247982]

#### Additional File 4

*MSE and SSIM results from the generalisability tests, between high-resolution WH-bSSFP and super-resolved data from different levels of down-sampling. Displayed as mean  $\pm$  standard deviation over the 25 synthetic test data sets.*

| <b>Percentage of lines<br/>Sampled in <i>ky</i> and <i>kz</i></b> | <b>SSIM</b>                     | <b>MSE (<math>\times 10^{-3}</math>)</b> |
|-------------------------------------------------------------------|---------------------------------|------------------------------------------|
| 10%                                                               | 0.41 $\pm$ 0.05*                | 16.28 $\pm$ 4.44*                        |
| 20%                                                               | 0.62 $\pm$ 0.05*                | 5.70 $\pm$ 1.73*                         |
| 30%                                                               | 0.77 $\pm$ 0.04*                | 2.52 $\pm$ 0.94*                         |
| 40%                                                               | 0.89 $\pm$ 0.02*                | 1.35 $\pm$ 0.67*                         |
| <b>50%</b>                                                        | <b>0.96<math>\pm</math>0.01</b> | <b>0.68<math>\pm</math>0.45</b>          |
| 60%                                                               | 0.95 $\pm$ 0.01*                | 0.80 $\pm$ 0.41                          |
| 70%                                                               | 0.93 $\pm$ 0.01*                | 1.14 $\pm$ 0.50*                         |
| 80%                                                               | 0.91 $\pm$ 0.01*                | 1.54 $\pm$ 0.55*                         |
| 90%                                                               | 0.91 $\pm$ 0.01*                | 1.72 $\pm$ 0.58*                         |
| 100%                                                              | 0.90 $\pm$ 0.01*                | 1.91 $\pm$ 0.64*                         |

*\*Indicates statistically significantly poorer result compared to data sampled with 50% of lines in *ky* and *kz* ( $p < 0.05$ )*
