# Supplementary material for: Rapid whole-heart CMR with single volume super-resolution
Source: Springer Nature journal article supplement (doi:10.1186/s12968-020-00651-x), 2020-01-01

## Additional File 5

Primary observer; Bland-Altman plots of agreement with high-resolution WH-bSSFP for the individual vessels; ascending aorta (AAo), descending aorta (DAo), main pulmonary artery (MPA), right pulmonary artery (RPA), and left pulmonary artery (LPA). The solid red line indicates the bias, with the dashed red lines showing the upper and lower limits of agreement ( $\text{bias} \pm 1.96 \times \text{StandardDeviation}$ ) between the techniques.

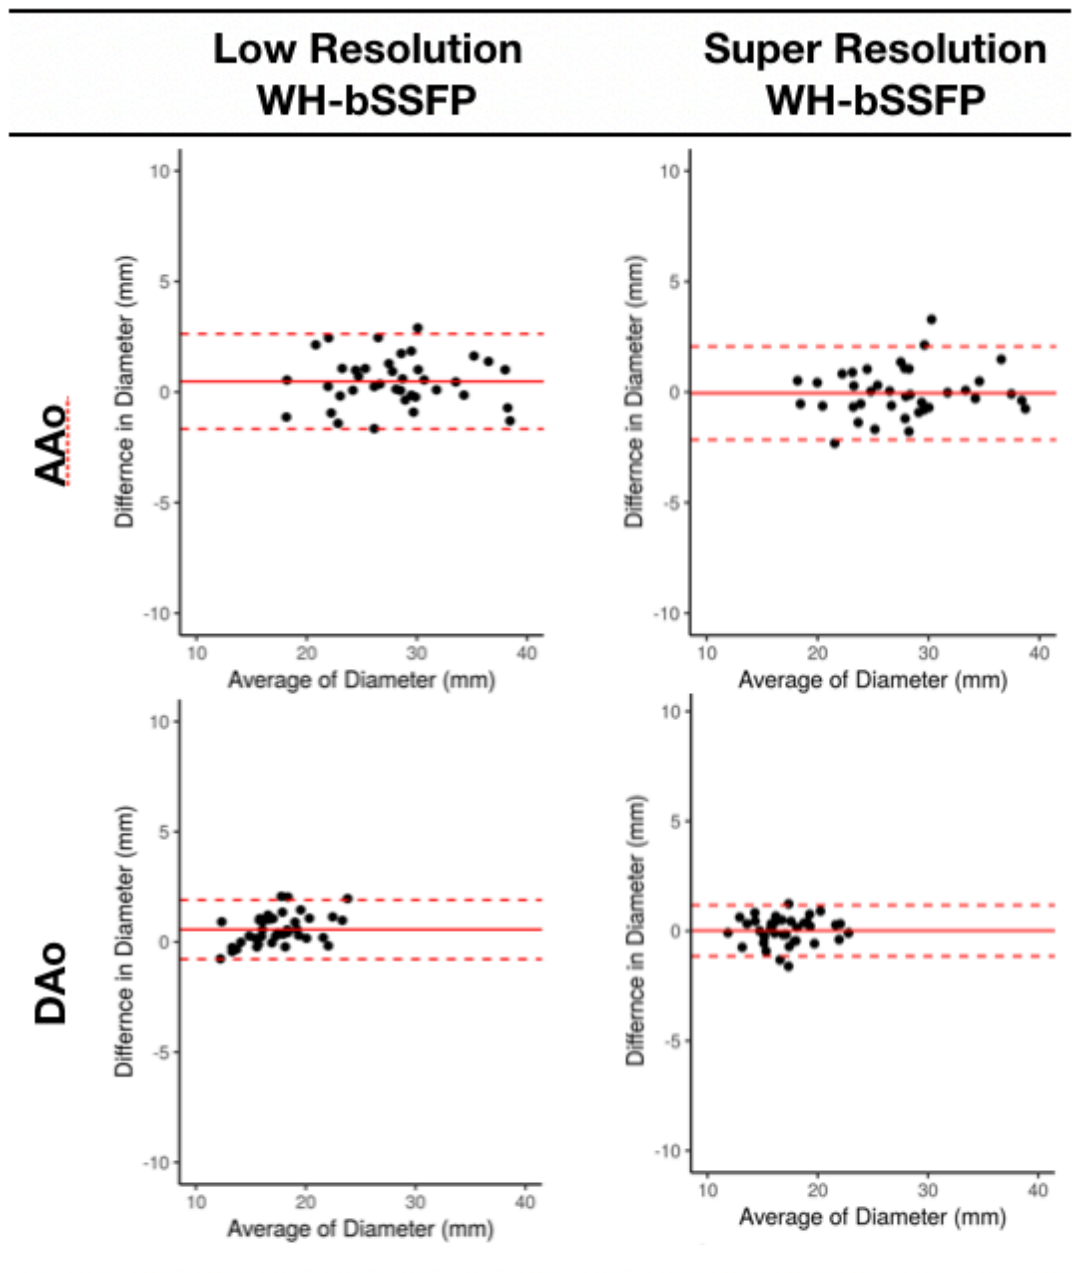

**Low Resolution  
WH-bSSFP**

**Super Resolution  
WH-bSSFP**

**MPA**

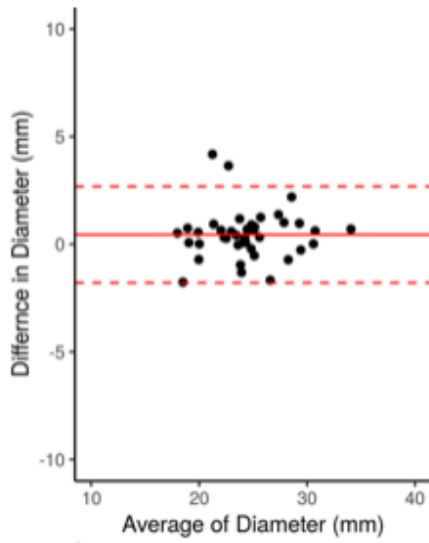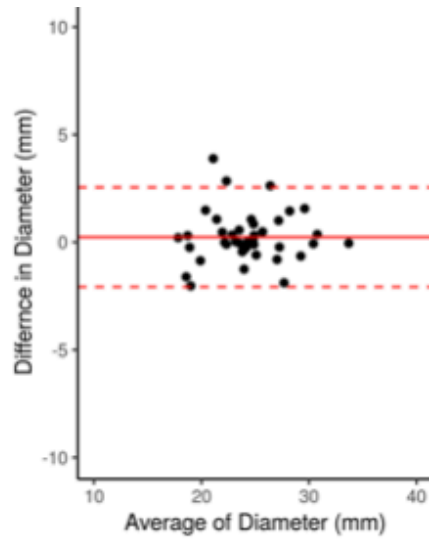

**LPA**

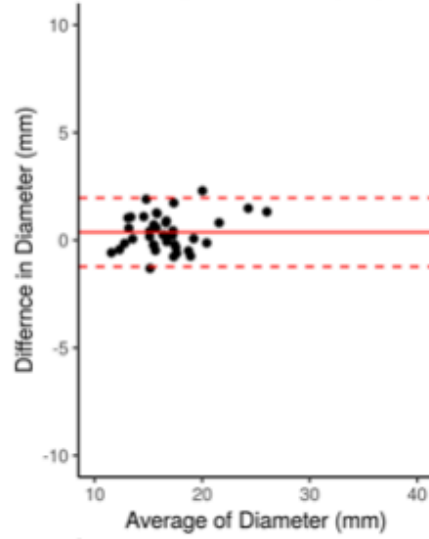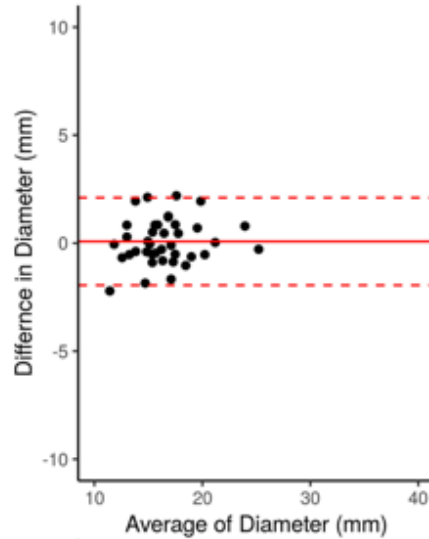

**RPA**

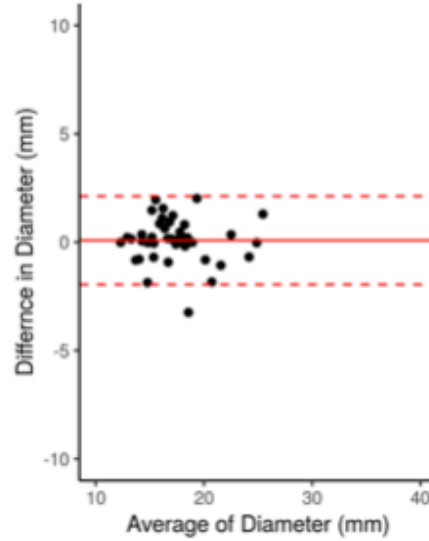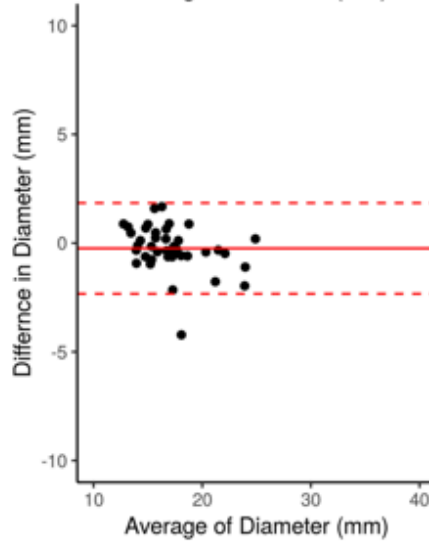

Supplement: MOESM5 [file 18247982]
