# Supplementary material for: Rapid whole-heart CMR with single volume super-resolution
Source: Springer Nature journal article supplement (doi:10.1186/s12968-020-00651-x), 2020-01-01
Supplement: MOESM6 [file 18247982]

## **Additional File 6**

### *Diagnostic Accuracy and Confidence from scoring*

*The table below shows the sensitivities and specificities for detection of the individual lesions in the high-resolution, low-resolution and super-resolution data. Values are displayed as Sensitivity/Specificity (95% confidence intervals).:*

MPA; Main Pulmonary Artery

RPA; Right Pulmonary Artery

LPA; Left Pulmonary Artery

RCA; Right Coronary Artery

LCA; Left Coronary Artery

CoA; Coarctation of the Aorta

VSD; Ventricular Septal Defect

|                      | High-resolution        | Low-resolution         | Super-resolution       |
|----------------------|------------------------|------------------------|------------------------|
| <b>Sensitivity</b>   |                        |                        |                        |
| MPA Stenosis         | 1.00<br>(0.66 to 1.00) | 1.00<br>(0.66 to 1.00) | 1.00<br>(0.66 to 1.00) |
| RPA Stenosis         | 1.00<br>(0.66 to 1.00) | 1.00<br>(0.66 to 1.00) | 0.89<br>(0.52 to 1.00) |
| LPA Stenosis         | 1.00<br>(0.54 to 1.00) | 0.83<br>(0.36 to 1.00) | 1.00<br>(0.54 to 1.00) |
| RCA abnormality      | 0.67<br>(0.22 to 0.96) | 0.50<br>(0.12 to 0.88) | 0.67<br>(0.22 to 0.96) |
| LCA abnormality      | 0.89<br>(0.52 to 1.00) | 0.78<br>(0.4 to 0.97)  | 0.89<br>(0.52 to 1.00) |
| CoA                  | 0.83<br>(0.36 to 1.00) | 0.83<br>(0.36 to 1.00) | 0.83<br>(0.36 to 1.00) |
| Abnormal Aortic Arch | 1.00<br>(0.81 to 1.00) | 1.00<br>(0.81 to 1.00) | 1.00<br>(0.81 to 1.00) |
| VSD                  | 0.50<br>(0.12 to 0.88) | 0.67<br>(0.22 to 0.96) | 0.50<br>(0.12 to 0.88) |
| All abnormalities    | 0.74<br>(0.63 to 0.83) | 0.71<br>(0.61 to 0.81) | 0.73<br>(0.62 to 0.82) |
| <b>Specificity</b>   |                        |                        |                        |
| MPA Stenosis         | 0.10<br>(0.08 to 0.13) | 0.11<br>(0.08 to 1.00) | 0.10<br>(0.08 to 0.13) |
| RPA Stenosis         | 0.11<br>(0.08 to 0.14) | 0.11<br>(0.08 to 1.00) | 0.11<br>(0.08 to 0.14) |
| LPA Stenosis         | 0.10<br>(0.08 to 0.13) | 0.10<br>(0.08 to 1.00) | 0.10<br>(0.08 to 0.13) |
| RCA abnormality      | 0.09<br>(0.07 to 0.12) | 0.07<br>(0.05 to 0.88) | 0.08<br>(0.06 to 0.11) |
| LCA abnormality      | 0.10<br>(0.08 to 0.13) | 0.09<br>(0.07 to 0.97) | 0.09<br>(0.07 to 0.12) |
| CoA                  | 0.11<br>(0.09 to 0.15) | 0.11<br>(0.08 to 1.00) | 0.11<br>(0.09 to 0.15) |
| Abnormal Aortic Arch | 0.08<br>(0.06 to 0.11) | 0.08<br>(0.06 to 1.00) | 0.08<br>(0.06 to 0.11) |
| VSD                  | 0.09<br>(0.07 to 0.12) | 0.07<br>(0.05 to 0.96) | 0.09<br>(0.07 to 0.12) |
| All abnormalities    | 0.94<br>(0.91 to 0.96) | 0.86<br>(0.83 to 0.90) | 0.91<br>(0.88 to 0.94) |

The table below shows the inter-rater reliability for the different lesions, as assessed by Fleiss's Kappa comparisons. Displayed as Kappa (95% confidence intervals).

|                      | <b>High-resolution</b> | <b>Low-resolution</b>   | <b>Super-resolution</b> |
|----------------------|------------------------|-------------------------|-------------------------|
| MPA Stenosis         | 0.79<br>(0.73 to 0.86) | 0.78<br>(0.72 to 0.84)  | 0.79<br>(0.73 to 0.86)  |
| RPA Stenosis         | 1.00<br>(0.94 to 1.10) | 1.00<br>(0.94 to 1.10)  | 0.86<br>(0.79 to 0.92)  |
| LPA Stenosis         | 1.00<br>(0.94 to 1.10) | 0.79<br>(0.73 to 0.86)  | 1.00<br>(0.94 to 1.10)  |
| RCA abnormality      | 0.56<br>(0.5 to 0.63)  | 0.29*<br>(0.22 to 0.35) | 0.43<br>(0.36 to 0.49)  |
| LCA abnormality      | 0.59<br>(0.52 to 0.65) | 0.44<br>(0.37 to 0.50)  | 0.53<br>(0.47 to 0.60)  |
| CoA                  | 0.78<br>(0.72 to 0.85) | 0.52<br>(0.45 to 0.58)  | 0.78<br>(0.72 to 0.85)  |
| Abnormal Aortic Arch | 0.79<br>(0.73 to 0.85) | 0.73<br>(0.67 to 0.80)  | 0.73<br>(0.66 to 0.79)  |
| VSD                  | 0.21<br>(0.15 to 0.28) | 0.39<br>(0.33 to 0.46)  | 0.22<br>(0.16 to 0.29)  |
| All abnormalities    | 0.15<br>(0.14 to 0.15) | 0.09*<br>(0.08 to 0.10) | 0.13<br>(0.12 to 0.14)  |

\* Indicates significant differences between observers ( $p < 0.05$ )

Additionally we assessed diagnostic confidence of the three techniques. High was given by a score of 2, intermediate confidence a score of 1, and low confidence a score of 0. The table below shows mean  $\pm$  standard deviation of the confidence scores.

|                      | High-resolution | Low-resolution | Super-resolution       |
|----------------------|-----------------|----------------|------------------------|
| MPA Stenosis         | 2.0 ± 0.2       | 1.9 ± 0.4      | 1.9 ± 0.2              |
| RPA Stenosis         | 2.0 ± 0.1       | 1.8 ± 0.4*     | 1.9 ± 0.3 <sup>†</sup> |
| LPA Stenosis         | 2.0 ± 0.2       | 1.8 ± 0.5      | 1.9 ± 0.3              |
| RCA abnormality      | 1.6 ± 0.7       | 1.0 ± 0.9      | 1.4 ± 0.8              |
| LCA abnormality      | 1.8 ± 0.5       | 1.3 ± 0.7      | 1.5 ± 0.8              |
| CoA                  | 2.0 ± 0.3       | 1.9 ± 0.4      | 1.9 ± 0.3              |
| Abnormal Aortic Arch | 2.0 ± 0.1       | 1.9 ± 0.4*     | 2.0 ± 0.0              |
| VSD                  | 1.5 ± 0.6       | 1.2 ± 0.7      | 1.4 ± 0.6              |
| All abnormalities    | 1.8 ± 0.4       | 1.6 ± 0.7*     | 1.7 ± 0.6 <sup>†</sup> |

\* Indicates significant differences with high-resolution technique ( $p < 0.05$ ) as assessed by Friedman's test with post-hoc testing using the Nemenyi test

<sup>†</sup> Indicates significant differences with low-resolution technique ( $p < 0.05$ ) as assessed by Friedman's test with post-hoc testing using the Nemenyi test
